# Supplementary material for: scGIST: gene panel design for spatial transcriptomics with prioritized gene sets
Source: PubMed Central journal article supplement (PMC10895727; doi:10.1186/s13059-024-03185-y), 2024-02-26
Supplement: 13059_2024_3185_MOESM1_ESM.pdf [file 13059_2024_3185_MOESM1_ESM.pdf]

Supplementary information for  
scGIST: gene panel design for spatial transcriptomics  
with prioritized gene sets

Mashrur Ahmed Yafi<sup>1</sup>, Md. Hasibul Husain Hisham<sup>1</sup>, Francisco Grisanti<sup>2</sup>,  
James F. Martin<sup>2,3</sup>, Atif Rahman<sup>1,\*</sup>, and Md. Abul Hassan Samee<sup>2,\*</sup>

<sup>1</sup>Department of Computer Science and Engineering, Bangladesh  
University of Engineering and Technology, Dhaka, 1205, Bangladesh

<sup>2</sup>Department of Integrative Physiology, Baylor College of Medicine,  
Houston, TX 77030, USA

<sup>3</sup>Cardiomyocyte Renewal Laboratory, Texas Heart Institute, Houston,  
TX 77030, USA

\*Co-corresponding authors: [atif@cse.buet.ac.bd](mailto:atif@cse.buet.ac.bd), [samee@bcm.edu](mailto:samee@bcm.edu)

# Contents

|          |                                                             |           |
|----------|-------------------------------------------------------------|-----------|
| <b>1</b> | <b>Supplementary Figures</b>                                | <b>3</b>  |
| <b>2</b> | <b>Supplementary Tables</b>                                 | <b>11</b> |
| <b>3</b> | <b>Supplementary Notes</b>                                  | <b>18</b> |
| 3.1      | Alternate regularization penalty for panel size . . . . .   | 18        |
| 3.2      | Evaluation metrics . . . . .                                | 19        |
| 3.3      | Accuracies and Macro F1-Scores from Multiple Runs . . . . . | 19        |

# 1 Supplementary Figures

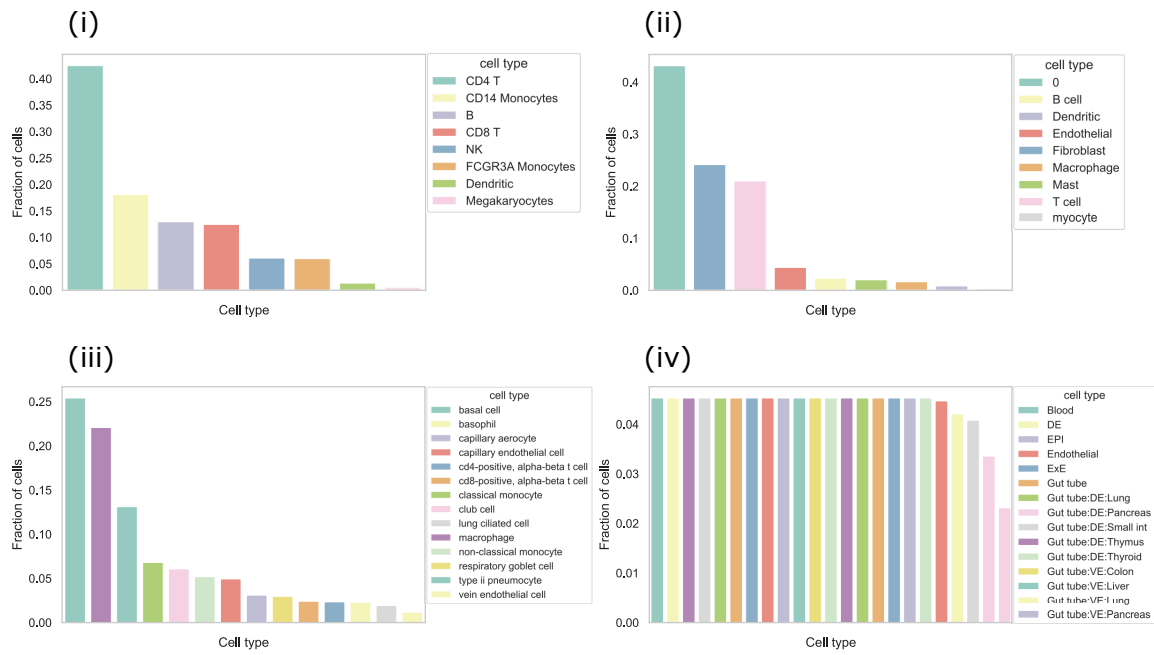

Figure S1: Ordered bar plot representing relative cell type abundance in different dataset. Panel (i) PBMC 3K, (ii) Head and Neck Cancer, (iii) Tabula Sapiens, (iv) Mouse Endoderm.

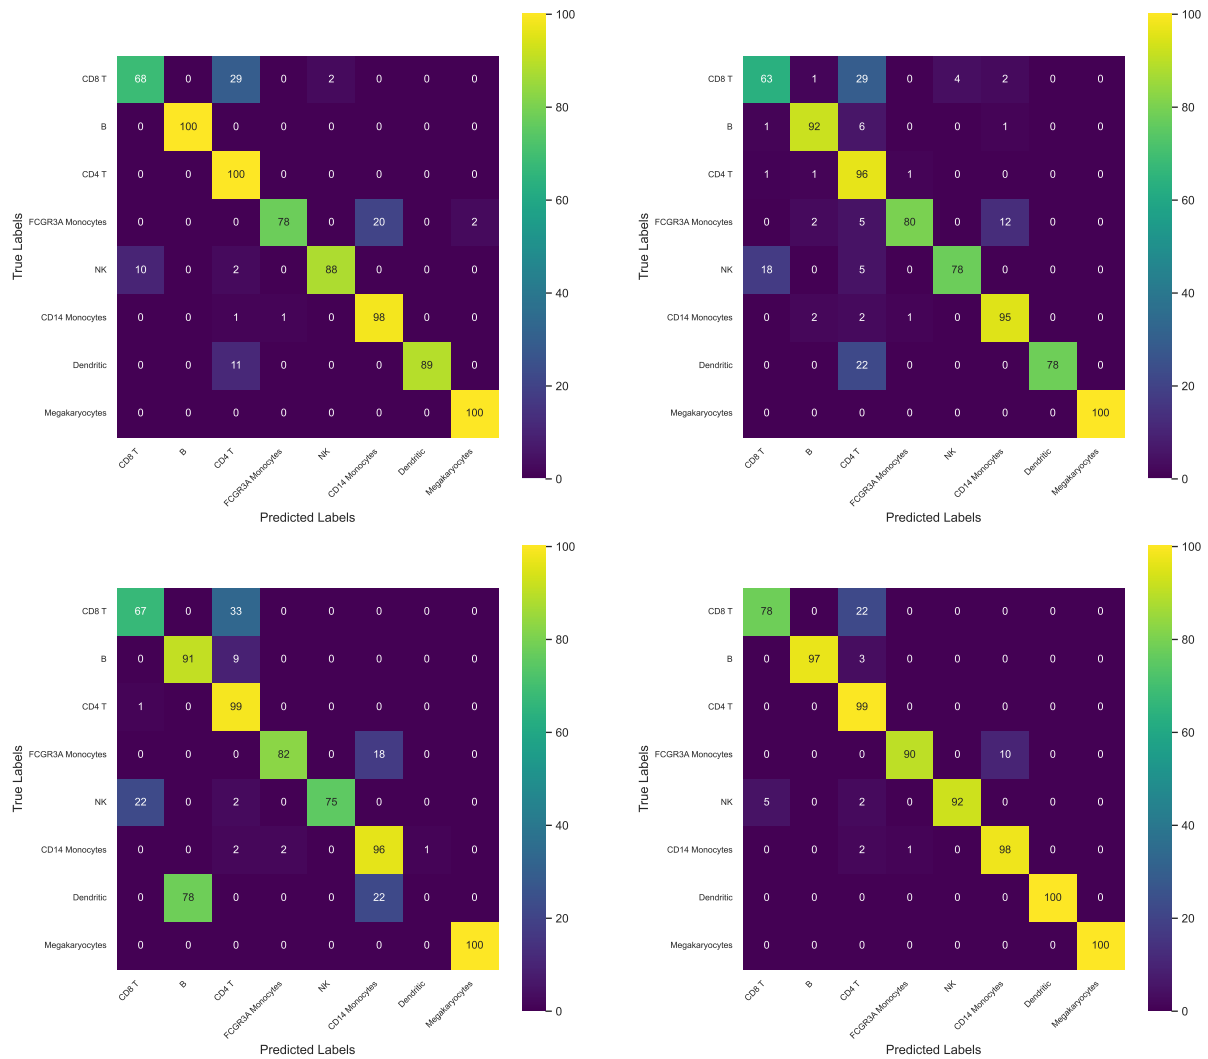

Figure S2: Confusion matrices of (a) scGeneFit, (b) geneBasis, (c) SMaSH and (d) scGIST on the PBMC 3K Dataset for panel size of 60.

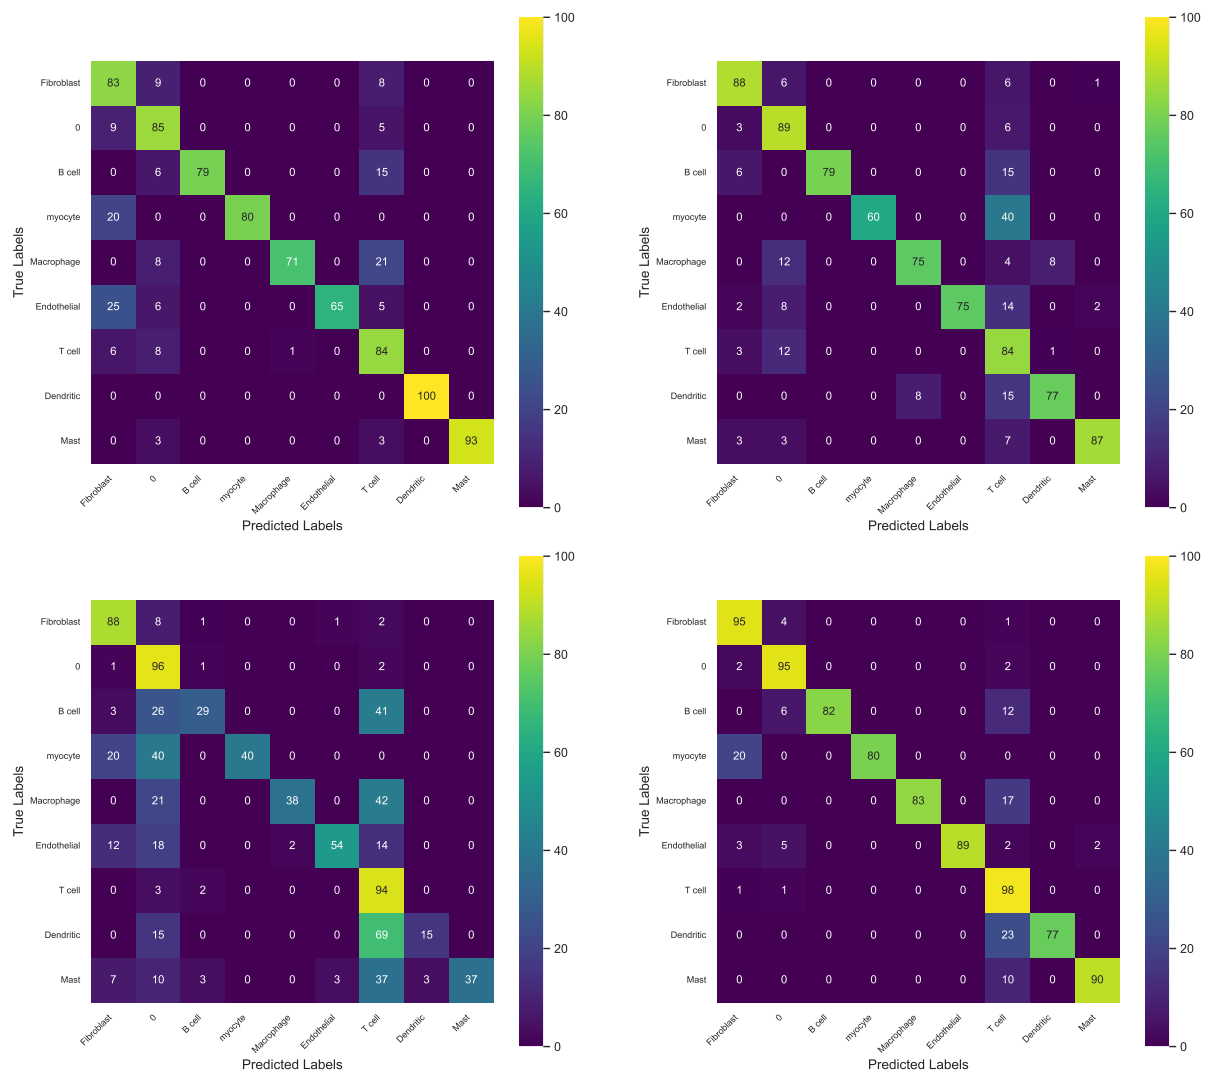

Figure S3: Confusion matrices of (a) scGeneFit, (b) geneBasis, (c) SMaSH and (d) scGIST on the Head and Neck Cancer Dataset for panel size of 60.

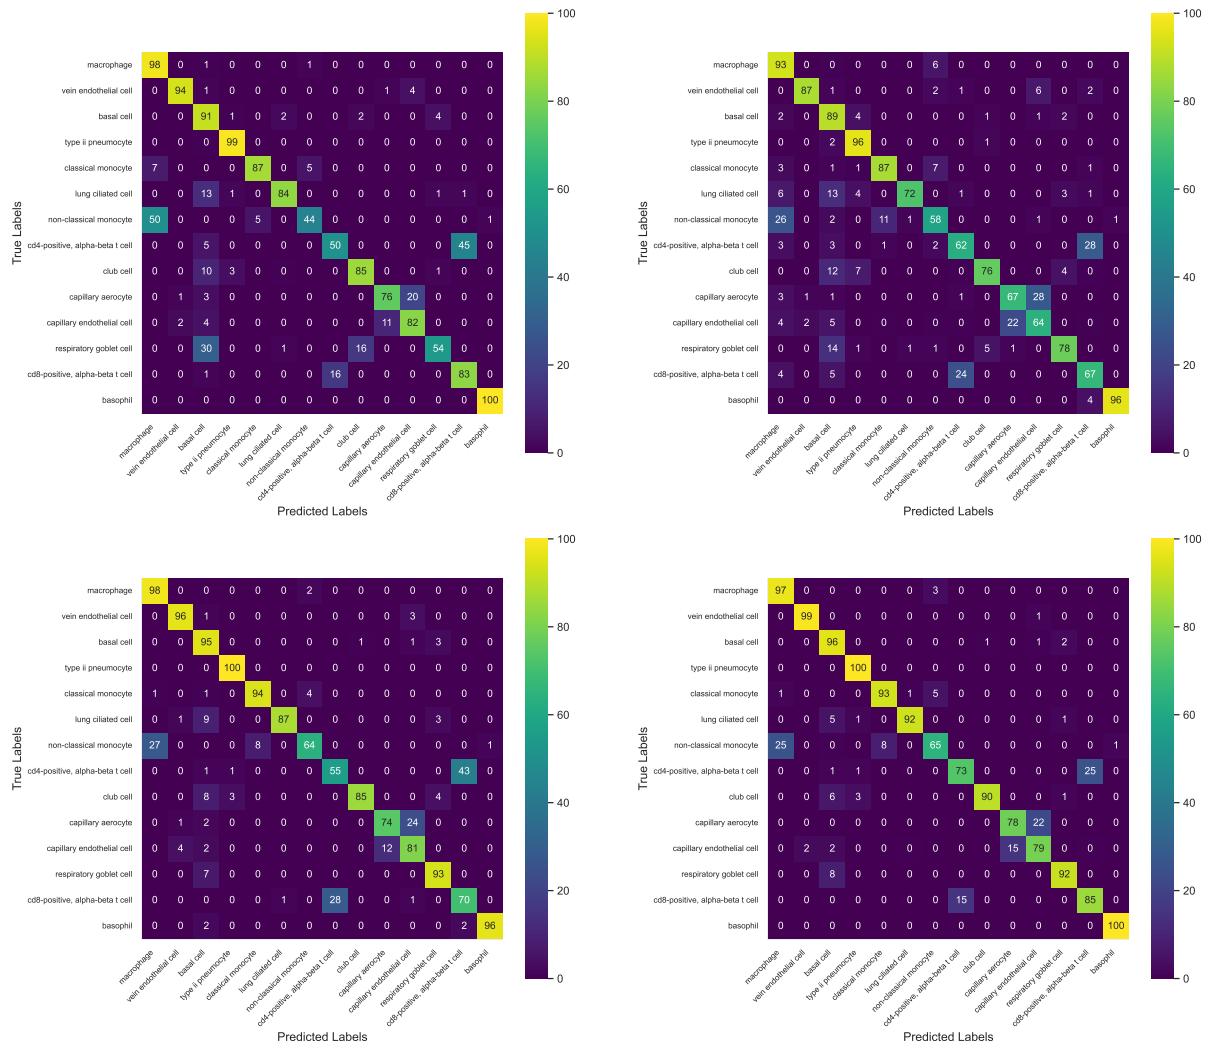

Figure S4: Confusion matrices of (a) scGeneFit, (b) geneBasis, (c) SMaSH and (d) scGIST on the Tabula Sapiens Dataset for panel size of 60.



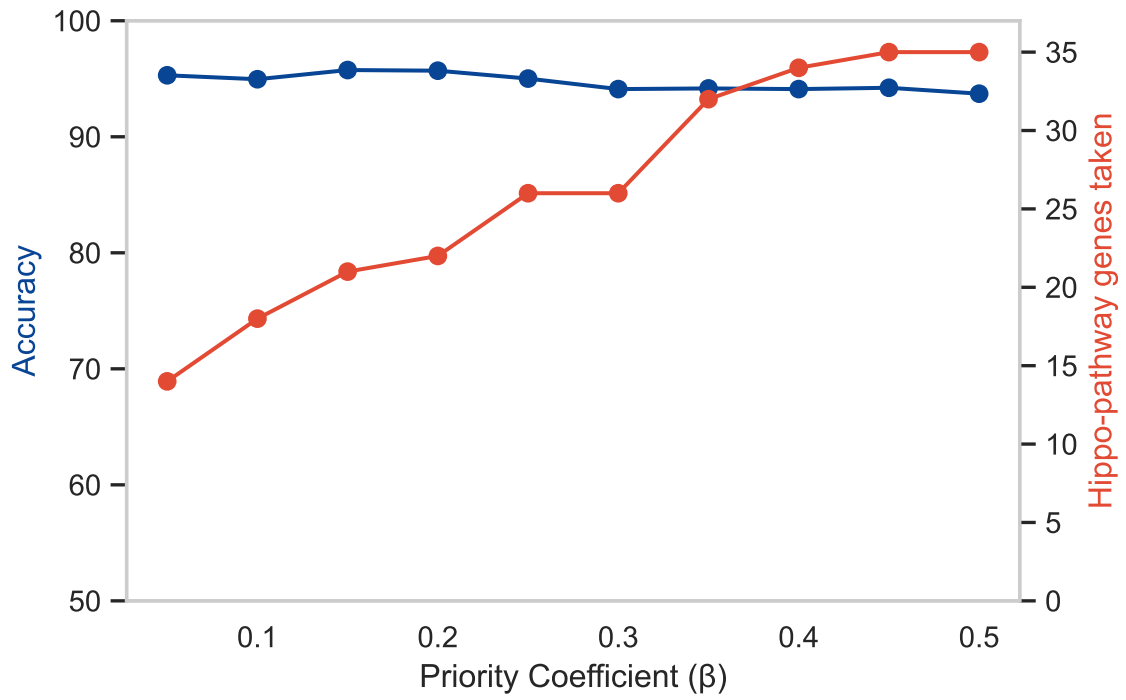

Figure S6: Comparison of accuracy and the number of **YAP-target** Hippo-pathway genes taken vs co-efficient of priority ( $\beta$ ) in a panel of size 100.

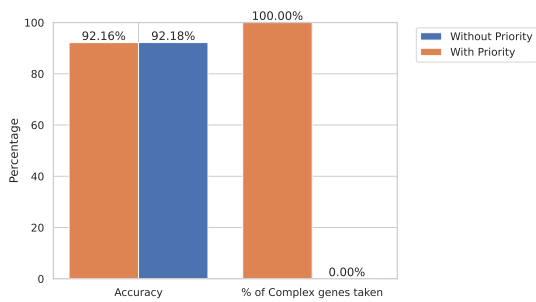

| Complex Name    | Gene Name |
|-----------------|-----------|
| IL2_receptor_HA | IL2RA     |
|                 | IL2RB     |
|                 | IL2RG     |

Figure S7: Complexes included in the panel from Tabula Sapiens Dataset



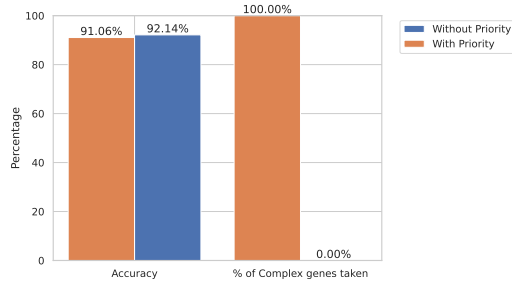

(a)

| Complex Name        | Gene Name  |
|---------------------|------------|
| IL2_receptor_HA     | IL2RA      |
|                     | IL2RB      |
|                     | IL2RG      |
| Simulated_complex_A | AC104248.1 |
|                     | RPL35A     |
|                     | LINC01871  |
| Simulated_complex_B | BPIFB1     |
|                     | LINC00891  |
|                     | HPGD       |
| Simulated_complex_C | ZNF655     |
|                     | BNIP2      |
|                     | LINC01550  |
|                     | PDIA5      |
| Simulated_complex_D | ILF2       |
|                     | HLA-DQA1   |
|                     | PPM1K      |
|                     | TYROBP     |
| Simulated_complex_E | COL9A2     |
|                     | Z99774.1   |
|                     | ZNF570     |
|                     | PELI2      |
|                     | AC104024.1 |
| Simulated_complex_F | ARL8A      |
|                     | NR2C2      |
|                     | ARSB       |
|                     | NPM1P18    |
|                     | CTSA       |

(b) Complexes

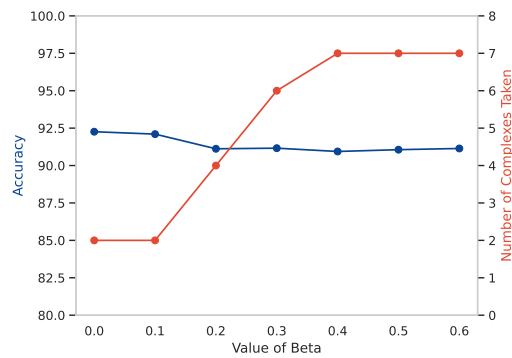

(c)

Figure S8: **(a-c)**. Analysis of more complex inclusion in a panel size of 80. **a**. Comparison of accuracy and number of complexes taken in the panel. **b**. All the complexes considered for the experiment, including 1 real receptor-ligand complex and 6 simulated ones. **c**. Accuracy and number of complexes inclusion for varying co-efficient of priority ( $\beta$ ).

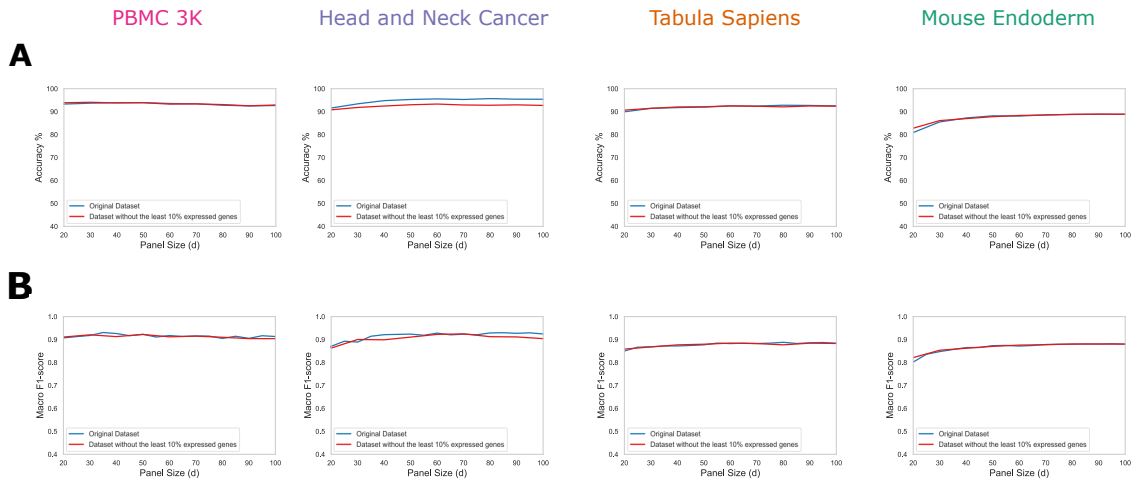

Figure S9: Comparison of **A.** Accuracies and **B.** Macro F1-Scores between the gene panels created using scGIST from the original datasets and datasets without the lowest 10% expressed genes.

## 2 Supplementary Tables

| Panel size | scGeneFit | geneBasis | SMaSH | scGIST |
|------------|-----------|-----------|-------|--------|
| 15         | 85.30     | 85.00     | 91.21 | 92.10  |
| 20         | 88.94     | 85.00     | 92.36 | 93.31  |
| 25         | 90.30     | 86.36     | 92.88 | 93.43  |
| 30         | 92.42     | 86.36     | 93.58 | 93.69  |
| 35         | 92.73     | 85.76     | 93.55 | 93.89  |
| 40         | 93.64     | 85.61     | 93.45 | 93.89  |
| 45         | 93.94     | 86.97     | 93.03 | 93.56  |
| 50         | 93.48     | 87.42     | 93.15 | 93.94  |
| 55         | 93.79     | 89.24     | 92.82 | 93.36  |
| 60         | 93.33     | 89.09     | 92.45 | 93.56  |
| 65         | 92.73     | 88.79     | 92.06 | 93.38  |
| 70         | 92.73     | 87.27     | 92.24 | 93.41  |
| 75         | 93.33     | 86.21     | 92.18 | 92.85  |
| 80         | 93.64     | 86.82     | 92.39 | 92.80  |
| 85         | 92.88     | 85.91     | 92.30 | 93.06  |
| 90         | 93.03     | 85.76     | 91.97 | 92.50  |
| 95         | 92.88     | 86.06     | 91.91 | 92.98  |
| 100        | 91.97     | 85.76     | 91.70 | 92.68  |

Table S1: Accuracy of various methods on the PBMC Dataset

| Panel size | scGeneFit | geneBasis | SMaSH | scGIST |
|------------|-----------|-----------|-------|--------|
| 15         | 0.81      | 0.79      | 0.85  | 0.91   |
| 20         | 0.84      | 0.79      | 0.86  | 0.91   |
| 25         | 0.85      | 0.82      | 0.87  | 0.91   |
| 30         | 0.91      | 0.85      | 0.90  | 0.92   |
| 35         | 0.91      | 0.84      | 0.90  | 0.93   |
| 40         | 0.91      | 0.83      | 0.90  | 0.93   |
| 45         | 0.92      | 0.86      | 0.90  | 0.92   |
| 50         | 0.91      | 0.86      | 0.90  | 0.92   |
| 55         | 0.92      | 0.88      | 0.90  | 0.91   |
| 60         | 0.91      | 0.88      | 0.88  | 0.92   |
| 65         | 0.89      | 0.86      | 0.88  | 0.91   |
| 70         | 0.92      | 0.84      | 0.89  | 0.92   |
| 75         | 0.91      | 0.82      | 0.90  | 0.92   |
| 80         | 0.93      | 0.83      | 0.90  | 0.90   |
| 85         | 0.92      | 0.82      | 0.90  | 0.91   |
| 90         | 0.93      | 0.82      | 0.89  | 0.91   |
| 95         | 0.93      | 0.83      | 0.89  | 0.92   |
| 100        | 0.92      | 0.82      | 0.89  | 0.91   |

Table S2: Macro F1-score of various methods on the PBMC Dataset

| Panel size | scGeneFit | geneBasis | SMaSH | scGIST |
|------------|-----------|-----------|-------|--------|
| 15         | 44.22     | 63.48     | 79.38 | 89.54  |
| 20         | 53.00     | 67.04     | 80.89 | 91.57  |
| 25         | 54.64     | 69.42     | 82.14 | 92.67  |
| 30         | 55.66     | 74.35     | 82.89 | 93.41  |
| 35         | 54.87     | 76.84     | 83.58 | 94.41  |
| 40         | 61.83     | 72.54     | 83.59 | 94.80  |
| 45         | 61.78     | 80.01     | 84.07 | 94.76  |
| 50         | 77.18     | 82.67     | 84.25 | 95.31  |
| 55         | 77.07     | 84.77     | 84.12 | 95.20  |
| 60         | 83.52     | 86.07     | 84.14 | 95.56  |
| 65         | 84.03     | 86.47     | 84.19 | 95.40  |
| 70         | 85.90     | 86.41     | 84.16 | 95.31  |
| 75         | 86.52     | 87.54     | 84.37 | 95.37  |
| 80         | 87.43     | 88.56     | 84.94 | 95.69  |
| 85         | 88.45     | 88.62     | 85.41 | 95.56  |
| 90         | 91.17     | 88.67     | 85.19 | 95.44  |
| 95         | 91.85     | 89.30     | 85.16 | 95.48  |
| 100        | 92.47     | 89.86     | 85.06 | 95.41  |

Table S3: Accuracy of various methods on the Head and Neck Cancer Dataset

| Panel size | scGeneFit | geneBasis | SMaSH | scGIST |
|------------|-----------|-----------|-------|--------|
| 15         | 0.69      | 0.53      | 0.40  | 0.81   |
| 20         | 0.70      | 0.61      | 0.44  | 0.87   |
| 25         | 0.74      | 0.64      | 0.46  | 0.89   |
| 30         | 0.75      | 0.75      | 0.50  | 0.89   |
| 35         | 0.74      | 0.76      | 0.51  | 0.91   |
| 40         | 0.74      | 0.75      | 0.52  | 0.92   |
| 45         | 0.74      | 0.78      | 0.53  | 0.92   |
| 50         | 0.80      | 0.79      | 0.54  | 0.92   |
| 55         | 0.79      | 0.81      | 0.53  | 0.92   |
| 60         | 0.83      | 0.81      | 0.55  | 0.93   |
| 65         | 0.83      | 0.83      | 0.54  | 0.92   |
| 70         | 0.75      | 0.84      | 0.56  | 0.92   |
| 75         | 0.74      | 0.85      | 0.57  | 0.92   |
| 80         | 0.78      | 0.86      | 0.58  | 0.93   |
| 85         | 0.78      | 0.86      | 0.58  | 0.93   |
| 90         | 0.80      | 0.87      | 0.57  | 0.93   |
| 95         | 0.80      | 0.88      | 0.57  | 0.93   |
| 100        | 0.80      | 0.88      | 0.58  | 0.92   |

Table S4: Macro F1-score of various methods on the Head and Neck Cancer Dataset

| Panel size | scGeneFit | geneBasis | SMaSH | scGIST |
|------------|-----------|-----------|-------|--------|
| 15         | 43.44     | 72.42     | 84.18 | 86.88  |
| 20         | 51.78     | 77.01     | 86.98 | 89.93  |
| 25         | 62.87     | 78.01     | 87.86 | 91.17  |
| 30         | 71.56     | 79.04     | 88.38 | 91.43  |
| 35         | 84.91     | 82.09     | 88.70 | 91.66  |
| 40         | 87.07     | 82.09     | 89.42 | 91.76  |
| 45         | 86.67     | 82.55     | 90.24 | 91.80  |
| 50         | 87.29     | 83.44     | 90.93 | 92.00  |
| 55         | 88.25     | 84.12     | 91.25 | 92.58  |
| 60         | 88.37     | 85.37     | 91.47 | 92.47  |
| 65         | 88.49     | 85.72     | 91.69 | 92.62  |
| 70         | 87.90     | 86.80     | 91.94 | 92.44  |
| 75         | 88.42     | 86.99     | 91.98 | 92.58  |
| 80         | 88.56     | 87.24     | 92.05 | 92.80  |
| 85         | 88.56     | 86.53     | 92.00 | 92.39  |
| 90         | 88.00     | 86.48     | 91.99 | 92.71  |
| 95         | 88.79     | 86.80     | 91.60 | 92.69  |
| 100        | 88.05     | 86.40     | 91.77 | 92.50  |

Table S5: Accuracy of various methods on the Tabula Sapiens Dataset

| Panel size | scGeneFit | geneBasis | SMaSH | scGIST |
|------------|-----------|-----------|-------|--------|
| 15         | 0.46      | 0.64      | 0.70  | 0.80   |
| 20         | 0.57      | 0.71      | 0.76  | 0.85   |
| 25         | 0.67      | 0.73      | 0.77  | 0.87   |
| 30         | 0.73      | 0.73      | 0.78  | 0.87   |
| 35         | 0.80      | 0.74      | 0.79  | 0.87   |
| 40         | 0.80      | 0.75      | 0.81  | 0.87   |
| 45         | 0.80      | 0.75      | 0.82  | 0.87   |
| 50         | 0.80      | 0.77      | 0.84  | 0.88   |
| 55         | 0.81      | 0.78      | 0.85  | 0.88   |
| 60         | 0.81      | 0.79      | 0.85  | 0.88   |
| 65         | 0.82      | 0.79      | 0.86  | 0.88   |
| 70         | 0.81      | 0.80      | 0.87  | 0.88   |
| 75         | 0.82      | 0.81      | 0.87  | 0.88   |
| 80         | 0.82      | 0.82      | 0.87  | 0.89   |
| 85         | 0.82      | 0.80      | 0.87  | 0.88   |
| 90         | 0.82      | 0.81      | 0.87  | 0.89   |
| 95         | 0.83      | 0.81      | 0.86  | 0.89   |
| 100        | 0.82      | 0.80      | 0.87  | 0.88   |

Table S6: Macro F1-score of various methods on the Tabula Sapiens Dataset

| Panel size | scGeneFit | geneBasis | SMaSH | scGIST |
|------------|-----------|-----------|-------|--------|
| 15         | 42.62     | 56.02     | 67.25 | 77.43  |
| 20         | 43.78     | 61.61     | 73.99 | 80.91  |
| 25         | 45.39     | 66.76     | 78.91 | 84.31  |
| 30         | 52.54     | 69.93     | 81.68 | 85.52  |
| 35         | 58.39     | 71.91     | 83.94 | 86.38  |
| 40         | 66.35     | 72.72     | 85.26 | 87.25  |
| 45         | 68.28     | 74.57     | 86.29 | 87.35  |
| 50         | 73.57     | 76.73     | 86.76 | 88.19  |
| 55         | 75.08     | 77.34     | 87.10 | 88.17  |
| 60         | 75.31     | 77.99     | 87.56 | 88.08  |
| 65         | 76.95     | 79.10     | 87.61 | 88.19  |
| 70         | 78.42     | 79.53     | 88.05 | 88.60  |
| 75         | 79.82     | 79.58     | 88.32 | 88.75  |
| 80         | 80.98     | 80.29     | 88.36 | 88.76  |
| 85         | 80.50     | 80.55     | 88.58 | 88.90  |
| 90         | 81.05     | 81.26     | 88.70 | 88.87  |
| 95         | 81.44     | 81.32     | 88.75 | 89.03  |
| 100        | 81.63     | 81.17     | 89.07 | 88.83  |

Table S7: Accuracy of various methods on the Mouse Endoderm Dataset

| Panel size | scGeneFit | geneBasis | SMaSH | scGIST |
|------------|-----------|-----------|-------|--------|
| 15         | 0.41      | 0.55      | 0.66  | 0.77   |
| 20         | 0.42      | 0.60      | 0.73  | 0.80   |
| 25         | 0.44      | 0.66      | 0.78  | 0.84   |
| 30         | 0.51      | 0.69      | 0.81  | 0.85   |
| 35         | 0.57      | 0.71      | 0.83  | 0.86   |
| 40         | 0.65      | 0.72      | 0.85  | 0.87   |
| 45         | 0.67      | 0.74      | 0.86  | 0.87   |
| 50         | 0.72      | 0.76      | 0.86  | 0.87   |
| 55         | 0.74      | 0.76      | 0.86  | 0.87   |
| 60         | 0.74      | 0.77      | 0.87  | 0.87   |
| 65         | 0.76      | 0.78      | 0.87  | 0.87   |
| 70         | 0.77      | 0.79      | 0.87  | 0.88   |
| 75         | 0.79      | 0.78      | 0.88  | 0.88   |
| 80         | 0.80      | 0.79      | 0.88  | 0.88   |
| 85         | 0.79      | 0.80      | 0.88  | 0.88   |
| 90         | 0.80      | 0.80      | 0.88  | 0.88   |
| 95         | 0.80      | 0.80      | 0.88  | 0.88   |
| 100        | 0.80      | 0.80      | 0.88  | 0.88   |

Table S8: Macro F1-score of various methods on the Mouse Endoderm Dataset

| Panel size | Accuracy | No. genes with easy to design probes taken |
|------------|----------|--------------------------------------------|
| 50         | 87.52    | 17                                         |
| 75         | 88.87    | 32                                         |
| 100        | 89.26    | 36                                         |
| 125        | 89.40    | 46                                         |
| 150        | 89.76    | 46                                         |
| 175        | 88.75    | 57                                         |
| 200        | 89.41    | 64                                         |
| 225        | 89.70    | 73                                         |
| 250        | 88.55    | 83                                         |
| 275        | 89.11    | 84                                         |
| 300        | 89.14    | 86                                         |
| 325        | 88.91    | 95                                         |
| 350        | 88.39    | 108                                        |
| 375        | 88.78    | 110                                        |
| 400        | 88.94    | 117                                        |
| 425        | 88.87    | 119                                        |
| 450        | 89.05    | 116                                        |
| 475        | 88.67    | 124                                        |
| 500        | 88.81    | 133                                        |

Table S9: Accuracy and numbers of genes with easy to design probes included in the panel by scGIST when no genes are assigned priority and  $\beta = 0.2$

| Panel size | Accuracy | No. genes with easy to design probes taken |
|------------|----------|--------------------------------------------|
| 50         | 87.16    | 31                                         |
| 75         | 88.69    | 43                                         |
| 100        | 88.64    | 60                                         |
| 125        | 88.22    | 76                                         |
| 150        | 88.34    | 93                                         |
| 175        | 88.66    | 110                                        |
| 200        | 88.57    | 131                                        |
| 225        | 89.28    | 151                                        |
| 250        | 88.72    | 172                                        |
| 275        | 88.43    | 195                                        |
| 300        | 88.40    | 212                                        |
| 325        | 88.19    | 240                                        |
| 350        | 87.69    | 258                                        |
| 375        | 87.31    | 286                                        |
| 400        | 86.80    | 312                                        |
| 425        | 86.15    | 345                                        |
| 450        | 85.85    | 366                                        |
| 475        | 85.71    | 385                                        |
| 500        | 85.92    | 385                                        |

Table S10: Accuracy and numbers of genes with easy to design probes included in the panel by scGIST when genes with easy to design probes are assigned priority score 1 and  $\beta = 0.2$



| Beta ( $\beta$ ) | Accuracy | No. genes with easy to design probes taken |
|------------------|----------|--------------------------------------------|
| 0                | 88.93    | 114                                        |
| 0.025            | 88.78    | 135                                        |
| 0.05             | 89.17    | 161                                        |
| 0.075            | 89.31    | 187                                        |
| 0.1              | 88.84    | 220                                        |
| 0.125            | 87.87    | 244                                        |
| 0.15             | 87.21    | 266                                        |
| 0.175            | 87.43    | 289                                        |
| 0.2              | 86.57    | 315                                        |
| 0.225            | 85.74    | 330                                        |
| 0.25             | 85.39    | 348                                        |
| 0.275            | 84.81    | 357                                        |
| 0.3              | 84.96    | 362                                        |
| 0.325            | 83.73    | 373                                        |
| 0.35             | 83.61    | 376                                        |
| 0.375            | 83.43    | 382                                        |
| 0.4              | 82.84    | 385                                        |
| 0.425            | 82.59    | 385                                        |
| 0.45             | 82.72    | 385                                        |
| 0.475            | 83.04    | 385                                        |
| 0.5              | 82.65    | 385                                        |

Table S11: Accuracy and numbers of genes with easy to design probes included in the panel by scGIST for varying  $\beta$  when genes with easy to design probes are assigned priority score 1 and panel size is 400

### 3 Supplementary Notes

#### 3.1 Alternate regularization penalty for panel size

In the default configuration, scGIST is strict about panel size, which means the regularization function penalizes for including more or less genes than the given panel size. It may not always be the desired outcome. Sometimes we want to create a panel with as few genes as possible without sacrificing accuracy. In the alternate regularization function, we change the second part of the regularization function to  $\alpha \max(\|w\|_1 - d, 0)$  from  $\alpha \|\|w\|_1 - d\|$ . Supplementary Figure S10 shows the regularization loss against the number of genes included in the panel for default and alternate regularization functions. The accuracy and the numbers of genes included in the panel for varying target panel sizes for the two modes are shown in Supplementary Figure S11.

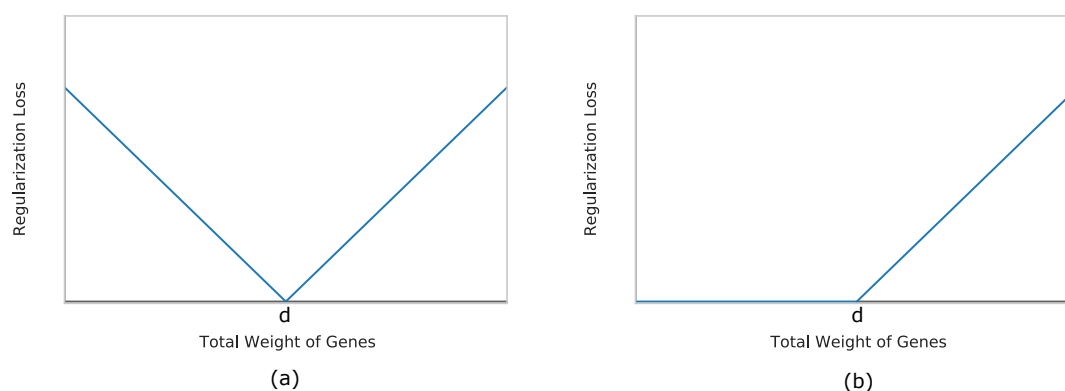

Figure S10: Comparison of regularization loss vs number of genes included in panels for (a) default and (b) alternate regularization functions.

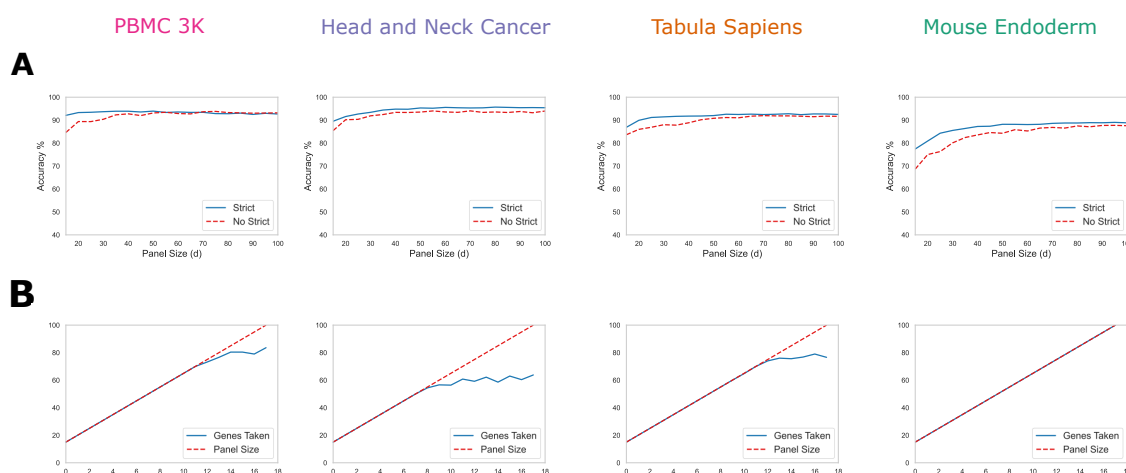

Figure S11: **A.** Accuracy of the default (strict) mode and the alternate (non-strict) mode for different datasets for varying target panel size, **B.** Comparison of target panel size and the numbers of genes included in the panel in for the two modes.

### 3.2 Evaluation metrics

Cell type prediction is multi-class classification problem with possible class imbalance. We used accuracy and macro F1-score as the evaluation metrics to assess various tools. Consider, a dataset with  $N$  samples and  $K$  possible classes. Let,  $TP_k$ ,  $TN_k$ ,  $FP_k$ ,  $FN_k$  be the number of true positives, true negatives, false positives and false negatives for the  $k$ -th class type. Then the accuracy is given by

$$Accuracy = \frac{\sum_{k=1}^K TP_k}{N}$$

However, accuracy can be misleading when there is class imbalance. So, we also use macro F1-score for assessment.

Precision and Recall for the  $k$ -th class type are given by

$$Precision_k = \frac{TP_k}{TP_k + FP_k}$$

$$Recall_k = \frac{TP_k}{TP_k + FN_k}$$

The macro average precision and recall are the averages over the precisions and recalls.

$$MacroAveragePrecision = \frac{\sum_{k=1}^K Precision_k}{K}$$

$$MacroAverageRecall = \frac{\sum_{k=1}^K Recall_k}{K}$$

The macro F1-score is then given by

$$MacroF1 - Score = 2 \left( \frac{MacroAveragePrecision * MacroAverageRecall}{MacroAveragePrecision^{-1} + MacroAverageRecall^{-1}} \right)$$

### 3.3 Accuracies and Macro F1-Scores from Multiple Runs

Our analysis involved running the model five times and taking their average for each of the 4 datasets. Remarkably, the obtained results show minimal variability in both accuracy and macro F1-score. Figure S12 demonstrates the consistent results across multiple runs. This uniformity reinforces the stability and reliability of the deep learning model of scGIST.

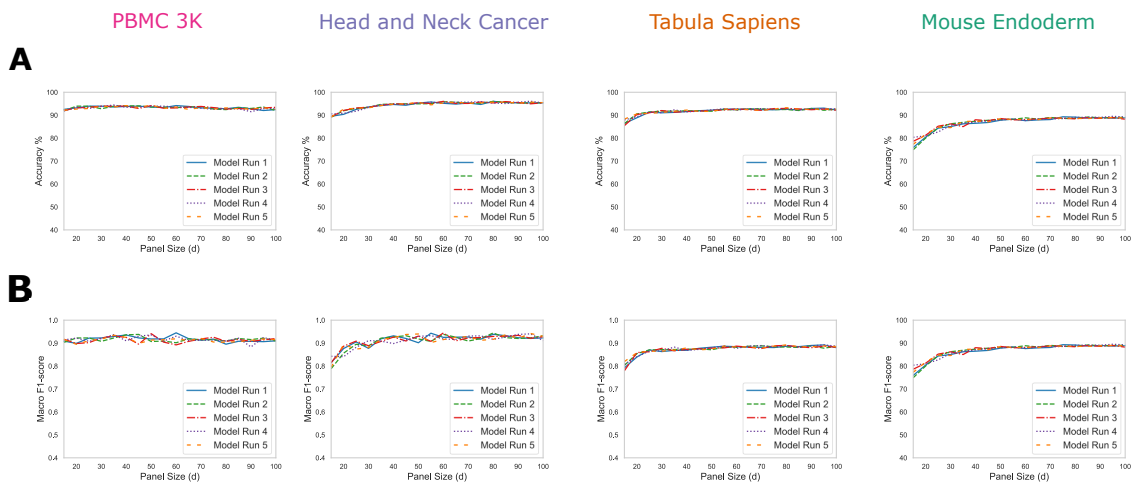

Figure S12: **A.** Accuracies and **B.** Macro F1-Scores of scGIST across multiple runs.
